# Supplementary material
Source: publisher figshare collection journal article supplement (https://tandf.figshare.com/ndownloader/files/11137625)
Supplement: Supplementary file 1 [file 11137625]

## Sheet: Table S1
Table S1. Detailed characteristics of the 380 micrhabitats sampled over three seasons during 2015 in nine reference sites in Greece
Sample No.	Site No.	Site name	Sample code	Sampling date	No. of taxa	No. of EPT taxa	SW diversity	Abundance	Water temperature (oC)	Substrate (Abbr.)	Substrate (No.)	Depth (m)	Average flow velocity (m/s)	Suitability (κ)
1	1	Fouskari	FouSp1	2015-05-09	14	7	2.29	48	18.4	SS	0.04	0.32	0.59	0.805713
2	1	Fouskari	FouSp2	2015-05-09	9	6	1.684	46	18.3	BO	0.07	0.26	0.03	0.589667
3	1	Fouskari	FouSp3	2015-05-09	8	3	1.802	21	19.1	SS	0.04	0.57	0.25	0.496266
4	1	Fouskari	FouSp4	2015-05-09	13	8	1.928	101	19.3	BO	0.07	0.1	0.55	0.80901
5	1	Fouskari	FouSp5	2015-05-09	8	5	1.874	20	18.3	SS	0.04	0.15	0.18	0.544355
6	1	Fouskari	FouSp6	2015-05-09	6	3	1.586	13	18.8	BO	0.07	0.38	1.07	0.414048
7	1	Fouskari	FouSp7	2015-05-09	11	4	1.341	95	19.1	LS	0.05	0.17	0	0.601988
8	1	Fouskari	FouSp8	2015-05-09	15	9	2.379	49	19.1	SS	0.04	0.17	0.3	0.881456
9	1	Fouskari	FouSp9	2015-05-09	16	10	2.267	62	19.3	BO	0.07	0.23	0.37	0.923733
10	1	Fouskari	FouSp10	2015-05-09	11	5	2.085	26	19.2	LG	0.03	0.22	0.04	0.647492
11	1	Fouskari	FouSp11	2015-05-09	12	7	2.054	65	18.1	LG	0.03	0.08	0.54	0.745726
12	1	Fouskari	FouSp12	2015-05-09	8	5	1.682	21	19	BO	0.07	0.39	0.15	0.521133
13	1	Fouskari	FouSp13	2015-05-09	13	7	1.923	88	18.8	LG	0.03	0.08	0.16	0.775508
14	1	Fouskari	FouSp14	2015-05-09	5	0	1.378	13	18.3	MG	0.026	0.16	0.02	0.304289
15	1	Fouskari	FouSp15	2015-05-09	12	5	2.13	47	18.2	SS	0.04	0.4	0.6	0.697488
16	1	Fouskari	FouSp16	2015-05-09	12	7	2.067	62	20.3	LG	0.03	0.17	0.66	0.744395
17	1	Fouskari	FouSp17	2015-05-09	17	9	2.292	98	19.6	SS	0.04	0.21	0.32	0.966059
18	1	Fouskari	FouSp18	2015-05-09	8	4	1.803	20	20.7	LG	0.03	0.27	0.41	0.515402
19	1	Fouskari	FouSp19	2015-05-09	8	5	1.53	26	19.3	SS	0.04	0.33	0.48	0.506916
20	1	Fouskari	FouSp20	2015-05-09	6	3	1.498	10	20	LG	0.03	0.08	0.16	0.39998
21	3	Ag. Dimitrios	AgDSp1	2015-05-16	11	7	1.881	66	14	LS	0.05	0.07	0.08	0.631878
22	3	Ag. Dimitrios	AgDSp2	2015-05-16	11	6	1.433	241	14	BO	0.07	0.13	0.15	0.590311
23	3	Ag. Dimitrios	AgDSp3	2015-05-16	13	8	1.704	166	14	SS	0.04	0.2	0.51	0.689664
24	3	Ag. Dimitrios	AgDSp4	2015-05-16	9	6	1.512	104	13.9	LS	0.05	0.24	0.18	0.529155
25	3	Ag. Dimitrios	AgDSp5	2015-05-16	9	5	1.512	29	14	LG	0.03	0.1	0.34	0.494597
26	3	Ag. Dimitrios	AgDSp6	2015-05-16	7	5	1.489	85	14	BO	0.07	0.25	0	0.461557
27	3	Ag. Dimitrios	AgDSp7	2015-05-16	15	9	2.182	101	14.1	LG	0.03	0.11	0.09	0.801478
28	3	Ag. Dimitrios	AgDSp8	2015-05-16	10	6	1.539	71	14.2	SS	0.04	0.21	0.88	0.546714
29	3	Ag. Dimitrios	AgDSp9	2015-05-16	5	4	1.16	16	14.3	FG	0.024	0.22	0.07	0.340971
30	3	Ag. Dimitrios	AgDSp10	2015-05-16	10	6	1.837	108	14.3	LS	0.05	0.26	0.22	0.595764
31	3	Ag. Dimitrios	AgDSp11	2015-05-16	9	6	1.663	113	14.4	LG	0.03	0.15	0.85	0.551881
32	3	Ag. Dimitrios	AgDSp12	2015-05-16	19	11	1.918	458	14.6	BO	0.07	0.12	0	0.963703
33	3	Ag. Dimitrios	AgDSp13	2015-05-16	19	8	1.927	211	14.6	LG	0.03	0.17	0.23	0.856465
34	3	Ag. Dimitrios	AgDSp14	2015-05-16	12	7	1.657	131	14.7	LS	0.05	0.26	0.65	0.636325
35	3	Ag. Dimitrios	AgDSp15	2015-05-16	10	7	1.29	75	14.8	BO	0.07	0.28	0.27	0.531535
36	3	Ag. Dimitrios	AgDSp16	2015-05-16	7	4	1.29	65	14.9	FG	0.024	0.42	0.48	0.411648
37	3	Ag. Dimitrios	AgDSp17	2015-05-16	12	8	1.903	138	15.3	SS	0.04	0.18	0.74	0.689858
38	3	Ag. Dimitrios	AgDSp18	2015-05-16	14	7	1.662	140	15.4	SS	0.04	0.23	0.82	0.681083
39	3	Ag. Dimitrios	AgDSp19	2015-05-16	14	10	1.858	174	15.3	BO	0.07	0.25	1.08	0.77
40	3	Ag. Dimitrios	AgDSp20	2015-05-16	11	8	1.452	167	15.3	SS	0.04	0.37	0.65	0.61313
41	4	Parapeiros_W	ParWSp1	2015-05-17	10	6	1.811	44	17.9	SS	0.04	0.15	0.69	0.733349
42	4	Parapeiros_W	ParWSp2	2015-05-17	6	4	1.577	22	17.6	LS	0.05	0.16	0.66	0.512406
43	4	Parapeiros_W	ParWSp3	2015-05-17	12	7	1.934	118	17.8	BO	0.07	0.18	0.47	0.898002
44	4	Parapeiros_W	ParWSp4	2015-05-17	7	3	1.778	13	17.8	LS	0.05	0.26	0.16	0.531296
45	4	Parapeiros_W	ParWSp5	2015-05-17	12	6	1.62	88	18	BO	0.07	0.18	0.3	0.802582
46	4	Parapeiros_W	ParWSp6	2015-05-17	9	6	1.964	25	18.1	SS	0.04	0.26	0.19	0.708861
47	4	Parapeiros_W	ParWSp7	2015-05-17	9	5	1.747	33	18.3	BO	0.07	0.2	0.05	0.658441
48	4	Parapeiros_W	ParWSp8	2015-05-17	5	4	1.352	12	18.7	LG	0.03	0.11	0.13	0.445676
49	4	Parapeiros_W	ParWSp9	2015-05-17	8	5	1.858	16	18.6	LS	0.05	0.25	0.42	0.630107
50	4	Parapeiros_W	ParWSp10	2015-05-17	10	6	1.818	68	19	BO	0.07	0.22	0.01	0.754612
51	4	Parapeiros_W	ParWSp11	2015-05-17	5	2	1.55	7	19	LS	0.05	0.28	0.6	0.410418
52	4	Parapeiros_W	ParWSp12	2015-05-17	9	5	1.85	24	19.7	LG	0.03	0.19	0.16	0.664402
53	4	Parapeiros_W	ParWSp13	2015-05-17	5	4	1.433	14	19.4	LS	0.05	0.34	0.36	0.458057
54	4	Parapeiros_W	ParWSp14	2015-05-17	11	6	2.274	16	19.4	LS	0.05	0.26	0.68	0.799274
55	4	Parapeiros_W	ParWSp15	2015-05-17	9	6	2.083	21	19.7	LG	0.03	0.17	0.83	0.72117
56	4	Parapeiros_W	ParWSp16	2015-05-17	14	7	2.03	97	19.7	BO	0.07	0.23	0.44	0.950013
57	4	Parapeiros_W	ParWSp17	2015-05-17	6	4	1.609	10	19.9	LG	0.03	0.28	0.35	0.506458
58	4	Parapeiros_W	ParWSp18	2015-05-17	8	5	1.961	22	20	BO	0.07	0.26	0.45	0.64878
59	4	Parapeiros_W	ParWSp19	2015-05-17	7	4	1.838	22	20.3	LS	0.05	0.19	0.22	0.57541
60	4	Parapeiros_W	ParWSp20	2015-05-17	9	5	1.716	45	20.6	SS	0.04	0.17	0	0.664521
61	5	Evinos_Up	EviSp1	2015-05-11	5	4	1.128	14	13.6	SS	0.04	0.2	0.0892	0.566888
62	5	Evinos_Up	EviSp2	2015-05-11	4	3	1.154	7	12.6	BO	0.07	0.36	0.8056	0.483602
63	5	Evinos_Up	EviSp3	2015-05-11	2	1	0.693	2	12.5	LS	0.05	0.53	1.4437	0.244952
64	5	Evinos_Up	EviSp4	2015-05-11	7	4	1.687	20	11.6	LG	0.03	0.08	0.2485	0.76795
65	5	Evinos_Up	EviSp5	2015-05-11	2	2	0.679	12	11.8	LS	0.05	0.27	1.576	0.292311
66	5	Evinos_Up	EviSp6	2015-05-11	8	7	1.447	40	11.6	LS	0.05	0.13	0.6382	0.897983
67	5	Evinos_Up	EviSp7	2015-05-11	4	3	1.332	5	11.5	BO	0.07	0.34	0.7705	0.511001
68	5	Evinos_Up	EviSp8	2015-05-11	1	1	0	1	11.6	SS	0.04	0.16	0	0.0751435
69	5	Evinos_Up	EviSp9	2015-05-11	5	4	1.263	15	11.7	LS	0.05	0.24	0.1333	0.593023
70	5	Evinos_Up	EviSp10	2015-05-11	2	1	0.451	6	11.8	SS	0.04	0.33	0.802	0.210428
71	5	Evinos_Up	EviSp11	2015-05-11	3	2	1.04	4	13.9	LS	0.05	0.39	0.586	0.383931
72	5	Evinos_Up	EviSp12	2015-05-11	3	2	1.04	4	13	MG	0.026	0.13	0.01	0.383931
73	5	Evinos_Up	EviSp13	2015-05-11	2	2	0.637	3	13	BO	0.07	0.51	0.9496	0.265693
74	5	Evinos_Up	EviSp14	2015-05-11	5	2	1.367	11	12.3	LG	0.03	0.36	0.5365	0.545864
75	5	Evinos_Up	EviSp15	2015-05-11	5	3	1.465	9	12.1	LS	0.05	0.25	0.5257	0.587607
76	5	Evinos_Up	EviSp16	2015-05-11	2	1	0.637	3	12.5	FG	0.024	0.24	0.0064	0.237121
77	5	Evinos_Up	EviSp17	2015-05-11	3	2	1.036	11	12.3	BO	0.07	0.31	0.7777	0.398113
78	5	Evinos_Up	EviSp18	2015-05-11	8	4	1.381	40	12.1	BO	0.07	0.28	0.0631	0.800532
79	5	Evinos_Up	EviSp19	2015-05-11	9	7	1.4	47	12	LG	0.03	0.13	0.5617	0.948963
80	5	Evinos_Up	EviSp20	2015-05-11	2	2	0.693	2	11.9	LS	0.05	0.19	0	0.273524
81	6	Mornos_Up	MorSp1	2015-05-10	7	5	1.946	7	15.3	SS	0.04	0.18	0.23	0.809067
82	6	Mornos_Up	MorSp2	2015-05-10	4	2	1.332	5	14.8	BO	0.07	0.28	0.1	0.474215
83	6	Mornos_Up	MorSp3	2015-05-10	1	1	0	1	14.6	BO	0.07	0.35	0.1	0.0816017
84	6	Mornos_Up	MorSp4	2015-05-10	4	4	1.33	6	14.5	LG	0.03	0.38	0.33	0.534085
85	6	Mornos_Up	MorSp5	2015-05-10	1	1	0	2	14.8	LG	0.03	0.19	0	0.084632
86	6	Mornos_Up	MorSp6	2015-05-10	8	7	1.979	12	14.6	LS	0.05	0.32	0.5	0.936364
87	6	Mornos_Up	MorSp7	2015-05-10	5	3	1.55	7	14.8	LS	0.05	0.21	0.04	0.591894
88	6	Mornos_Up	MorSp8	2015-05-10	2	1	0.693	2	14.8	FG	0.024	0.03	0	0.239685
89	6	Mornos_Up	MorSp9	2015-05-10	7	3	1.636	14	14.8	LG	0.03	0.19	0.6	0.726143
90	6	Mornos_Up	MorSp10	2015-05-10	3	2	1.04	4	15.2	BO	0.07	0.15	0.1	0.376919
91	6	Mornos_Up	MorSp11	2015-05-10	2	1	0.5	10	14.9	SS	0.04	0.52	0.1	0.23467
92	6	Mornos_Up	MorSp12	2015-05-10	3	1	0.9	8	15.2	SAND	0.022	0.049	0.1	0.339246
93	6	Mornos_Up	MorSp13	2015-05-10	5	4	1.609	5	14.9	LS	0.05	0.58	0.41	0.623348
94	6	Mornos_Up	MorSp14	2015-05-10	6	2	1.27	33	15	SAND	0.022	0.08	0.04	0.649664
95	6	Mornos_Up	MorSp15	2015-05-10	3	2	1.04	4	15	BO	0.07	0.37	0.2	0.376919
96	6	Mornos_Up	MorSp16	2015-05-10	3	2	1.099	3	15	MG	0.026	0.14	0.01	0.382833
97	6	Mornos_Up	MorSp17	2015-05-10	3	2	1.04	4	14.9	LS	0.05	0.45	0.33	0.376919
98	6	Mornos_Up	MorSp18	2015-05-10	7	5	1.834	10	15	SS	0.04	0.18	0.56	0.801179
99	6	Mornos_Up	MorSp19	2015-05-10	8	5	1.951	13	14.9	LS	0.05	0.19	0.6	0.878007
100	6	Mornos_Up	MorSp20	2015-05-10	6	4	1.609	10	14.8	LG	0.03	0.14	0.24	0.6885
101	7	Per06.1	Per06Sp1	2015-05-12	8	6	1.87	37	10.3	LG	0.03	0.12	0.16	0.653584
102	7	Per06.1	Per06Sp2	2015-05-12	8	5	1.616	45	10.2	LS	0.05	0.37	0.39	0.596286
103	7	Per06.1	Per06Sp3	2015-05-12	10	7	1.947	30	10.1	BO	0.07	0.18	0.1	0.737451
104	7	Per06.1	Per06Sp4	2015-05-12	12	8	1.646	109	10.3	SS	0.04	0.19	0.7	0.806729
105	7	Per06.1	Per06Sp5	2015-05-12	13	9	1.717	116	10.3	LS	0.05	0.29	0.71	0.870111
106	7	Per06.1	Per06Sp6	2015-05-12	7	5	1.412	56	10	LS	0.05	0.23	0.71	0.54377
107	7	Per06.1	Per06Sp7	2015-05-12	7	5	1.666	86	10.6	LG	0.03	0.38	0.04	0.598135
108	7	Per06.1	Per06Sp8	2015-05-12	8	5	1.67	68	10.7	LS	0.05	0.36	0.39	0.616281
109	7	Per06.1	Per06Sp9	2015-05-12	12	7	1.909	82	10.5	SS	0.04	0.14	0.24	0.811325
110	7	Per06.1	Per06Sp10	2015-05-12	7	5	1.741	28	10.2	BO	0.07	0.26	0.32	0.58025
111	7	Per06.1	Per06Sp11	2015-05-12	14	7	1.663	170	11.2	BO	0.07	0.21	0.26	0.871424
112	7	Per06.1	Per06Sp12	2015-05-12	14	9	1.662	142	10.9	BO	0.07	0.27	1.11	0.901501
113	7	Per06.1	Per06Sp13	2015-05-12	5	2	0.908	47	10.7	LS	0.05	0.54	0.48	0.341543
114	7	Per06.1	Per06Sp14	2015-05-12	15	8	1.773	158	10.1	SS	0.04	0.23	0.4	0.93117
115	7	Per06.1	Per06Sp15	2015-05-12	13	9	1.159	181	10.7	BO	0.07	0.27	0.08	0.817127
116	7	Per06.1	Per06Sp16	2015-05-12	13	5	1.595	106	11.3	LS	0.05	0.23	1.01	0.757348
117	7	Per06.1	Per06Sp17	2015-05-12	10	7	1.565	92	10.8	LS	0.05	0.12	0.57	0.710063
118	7	Per06.1	Per06Sp18	2015-05-12	15	9	1.445	197	10.7	LS	0.05	0.26	0.38	0.92265
119	7	Per06.1	Per06Sp19	2015-05-12	11	9	1.606	119	10.3	MC	0.02	0.12	0.25	0.801197
120	7	Per06.1	Per06Sp20	2015-05-12	7	5	1.249	94	10.7	SS	0.04	0.24	0.63	0.537943
121	8	SidePer10	SidePSp1	2015-05-12	4	1	0.928	46	12.4	BO	0.07	0.61	0.69	0.392186
122	8	SidePer10	SidePSp2	2015-05-12	6	3	0.945	60	12.2	LG	0.03	0.76	0.495	0.560406
123	8	SidePer10	SidePSp3	2015-05-12	2	2	0.693	10	12.2	LG	0.03	0.87	0.485	0.294821
124	8	SidePer10	SidePSp4	2015-05-12	2	1	0.53	9	12.2	MG	0.026	0.48	0.09	0.223593
125	8	SidePer10	SidePSp5	2015-05-12	4	2	1.095	27	12.2	BO	0.07	0.68	0.42	0.457029
126	8	SidePer10	SidePSp6	2015-05-12	2	1	0.693	4	12.3	LS	0.05	0.42	1.42	0.252679
127	8	SidePer10	SidePSp7	2015-05-12	7	3	0.818	166	12.2	LS	0.05	0.28	0.94	0.61421
128	8	SidePer10	SidePSp8	2015-05-12	5	3	0.765	72	12.2	LS	0.05	0.22	1.01	0.490601
129	8	SidePer10	SidePSp9	2015-05-12	10	4	1.584	47	12.1	MG	0.026	0.22	0.3	0.876786
130	8	SidePer10	SidePSp10	2015-05-12	5	2	0.947	77	12.1	LS	0.05	0.08	0.62	0.486856
131	8	SidePer10	SidePSp11	2015-05-12	7	5	1.29	89	12	LS	0.05	0.19	0.2	0.756104
132	8	SidePer10	SidePSp12	2015-05-12	7	5	1.347	90	12.2	LS	0.05	0.21	0.86	0.767256
133	8	SidePer10	SidePSp13	2015-05-12	6	4	0.976	122	12.3	BO	0.07	0.26	0.19	0.62842
134	8	SidePer10	SidePSp14	2015-05-12	5	3	0.632	280	12.2	LS	0.05	0.23	0.85	0.539697
135	8	SidePer10	SidePSp15	2015-05-12	2	1	0.251	29	12.2	SAND	0.022	0.07	0	0.177895
136	8	SidePer10	SidePSp16	2015-05-12	4	3	0.861	59	12.1	LS	0.05	0.47	0.75	0.46414
137	8	SidePer10	SidePSp17	2015-05-12	9	4	0.873	209	12.1	SS	0.04	0.13	0.52	0.759984
138	8	SidePer10	SidePSp18	2015-05-12	4	3	0.922	84	12.2	BO	0.07	0.18	0	0.484621
139	8	SidePer10	SidePSp19	2015-05-12	5	3	1.144	77	12.2	SS	0.04	0.04	0.6	0.564167
140	8	SidePer10	SidePSp20	2015-05-12	7	3	1.38	28	12.3	BO	0.07	0.21	0.08	0.671364
141	9	Spilia	SpilSp1	2015-05-13	6	5	1.393	76	10.7	LS	0.05	0.21	0.81	0.750981
142	9	Spilia	SpilSp2	2015-05-13	7	4	1.541	39	10.7	SS	0.04	0.26	0.52	0.755596
143	9	Spilia	SpilSp3	2015-05-13	5	3	1.371	20	10.6	LG	0.03	0.34	0.49	0.585925
144	9	Spilia	SpilSp4	2015-05-13	6	5	1.335	62	10.8	BO	0.07	0.18	0	0.728081
145	9	Spilia	SpilSp5	2015-05-13	4	2	1.332	5	10.9	SS	0.04	0.44	1.08	0.487761
146	9	Spilia	SpilSp6	2015-05-13	5	3	0.913	69	10.8	MG	0.026	0.21	0.82	0.547547
147	9	Spilia	SpilSp7	2015-05-13	9	5	1.228	40	10.5	MG	0.026	0.11	0	0.822584
148	9	Spilia	SpilSp8	2015-05-13	8	5	1.44	74	11.1	SS	0.04	0.21	0.49	0.846512
149	9	Spilia	SpilSp9	2015-05-13	8	4	1.666	58	11.2	BO	0.07	0.25	0.64	0.839419
150	9	Spilia	SpilSp10	2015-05-13	3	2	0.986	23	11.3	SS	0.04	0.48	0.79	0.397344
151	9	Spilia	SpilSp11	2015-05-13	7	4	1.514	86	11.3	LG	0.03	0.16	0.48	0.792719
152	9	Spilia	SpilSp12	2015-05-13	9	6	1.446	112	11.5	LS	0.05	0.16	0.58	0.959295
153	9	Spilia	SpilSp13	2015-05-13	8	6	1.367	101	11.3	BO	0.07	0.14	0.46	0.890863
154	9	Spilia	SpilSp14	2015-05-13	6	4	1.518	36	11.3	LS	0.05	0.21	1.38	0.704348
155	9	Spilia	SpilSp15	2015-05-13	4	2	1.094	19	11.2	LS	0.05	0.53	0.45	0.457583
156	9	Spilia	SpilSp16	2015-05-13	8	6	1.441	48	11.3	BO	0.07	0.18	1.13	0.856811
157	9	Spilia	SpilSp17	2015-05-13	6	3	1.358	29	11.3	LS	0.05	0.32	1.22	0.636074
158	9	Spilia	SpilSp18	2015-05-13	4	3	1.186	25	11.5	MG	0.026	0.14	0.41	0.512771
159	9	Spilia	SpilSp19	2015-05-13	9	5	1.673	43	11.2	SS	0.04	0.1	0.38	0.90506
160	9	Spilia	SpilSp20	2015-05-13	6	4	0.904	58	11.1	BO	0.07	0.31	0.19	0.61389
161	1	Fouskari	FouSu1	2015-08-24	3	2	1.04	4	23.5	LG	0.03	0.3	0.36	0.323647
162	1	Fouskari	FouSu2	2015-08-24	8	4	1.895	22	22.7	LS	0.05	0.28	0.26	0.691185
163	1	Fouskari	FouSu3	2015-08-24	11	5	1.762	44	21.8	LS	0.05	0.27	0.21	0.808934
164	1	Fouskari	FouSu4	2015-08-24	3	2	1.04	4	21.7	LG	0.03	0.18	0.3	0.323647
165	1	Fouskari	FouSu5	2015-08-24	6	4	1.473	16	21.5	SS	0.04	0.61	0.46	0.55492
166	1	Fouskari	FouSu6	2015-08-24	4	2	1.277	7	21.5	SS	0.04	0.27	0.06	0.395896
167	1	Fouskari	FouSu7	2015-08-24	4	3	1.162	11	21.5	BO	0.07	0.37	0.3	0.408122
168	1	Fouskari	FouSu8	2015-08-24	2	1	0.693	2	21.6	SS	0.04	0.76	0	0.205878
169	1	Fouskari	FouSu9	2015-08-24	3	1	0.578	17	23	LG	0.03	0.34	0.88	0.227982
170	1	Fouskari	FouSu10	2015-08-24	2	2	0.287	12	22.3	BO	0.07	0.24	0.08	0.174826
171	1	Fouskari	FouSu11	2015-08-24	4	3	0.873	26	22.1	SS	0.04	0.19	0.75	0.369346
172	1	Fouskari	FouSu12	2015-08-24	6	4	1.447	17	22.8	SS	0.04	0.14	0.08	0.551269
173	1	Fouskari	FouSu13	2015-08-24	5	2	1.295	11	22.4	LS	0.05	0.14	0.6	0.433939
174	1	Fouskari	FouSu14	2015-08-24	9	6	1.697	63	23.1	SS	0.04	0.07	0.58	0.769385
175	1	Fouskari	FouSu15	2015-08-24	7	5	1.748	14	22.1	BO	0.07	0.22	0.07	0.65943
176	1	Fouskari	FouSu16	2015-08-24	12	6	1.754	57	22.4	SS	0.04	0.15	0.55	0.875618
177	1	Fouskari	FouSu17	2015-08-24	10	7	1.54	53	21.4	LG	0.03	0.16	0.19	0.801784
178	1	Fouskari	FouSu18	2015-08-24	12	6	1.718	215	21.7	BO	0.07	0.2	0.66	0.943407
179	1	Fouskari	FouSu19	2015-08-24	8	3	1.813	29	21.5	LG	0.03	0.09	0.12	0.652888
180	1	Fouskari	FouSu20	2015-08-24	8	3	1.235	82	20.9	LS	0.05	0.14	0.34	0.586035
181	2	Krathis_Up	KrSu1	2015-08-25	10	4	0.722	127	11.7	MG	0.026	0.26	0.29	0.582088
182	2	Krathis_Up	KrSu2	2015-08-25	4	2	0.325	82	11.9	LG	0.03	0.39	0.15	0.260003
183	2	Krathis_Up	KrSu3	2015-08-25	3	1	0.684	9	11.6	BO	0.07	0.21	0	0.237992
184	2	Krathis_Up	KrSu4	2015-08-25	10	3	1.795	28	12	LG	0.03	0.31	0.1	0.702102
185	2	Krathis_Up	KrSu5	2015-08-25	7	3	1.481	38	12.3	SAND	0.022	0.32	0.01	0.560421
186	2	Krathis_Up	KrSu6	2015-08-25	12	4	0.628	175	11.7	LS	0.05	0.13	0.43	0.642823
187	2	Krathis_Up	KrSu7	2015-08-25	9	3	0.341	322	12.2	LS	0.05	0.24	0.84	0.519629
188	2	Krathis_Up	KrSu8	2015-08-25	5	2	0.318	144	12	LS	0.05	0.2	0.77	0.308857
189	2	Krathis_Up	KrSu9	2015-08-25	9	4	1.669	52	12	SILT	0.02	0.24	0	0.686299
190	2	Krathis_Up	KrSu10	2015-08-25	13	7	0.778	207	12.4	BO	0.07	0.28	0.16	0.794314
191	2	Krathis_Up	KrSu11	2015-08-25	7	5	0.364	147	12	BO	0.07	0.22	0.19	0.46473
192	2	Krathis_Up	KrSu12	2015-08-25	10	5	0.703	136	11.7	SS	0.04	0.19	0.23	0.610279
193	2	Krathis_Up	KrSu13	2015-08-25	6	2	0.537	151	11.7	LS	0.05	0.22	0.1	0.378402
194	2	Krathis_Up	KrSu14	2015-08-25	4	3	0.535	161	12.1	LS	0.05	0.34	0.3	0.348206
195	2	Krathis_Up	KrSu15	2015-08-25	6	3	0.888	46	12.1	BO	0.07	0.05	0.13	0.433028
196	2	Krathis_Up	KrSu16	2015-08-25	11	4	1.305	104	11.9	SS	0.04	0.14	0.46	0.703151
197	2	Krathis_Up	KrSu17	2015-08-25	6	2	0.431	115	11.9	LG	0.03	0.16	0.14	0.349506
198	2	Krathis_Up	KrSu18	2015-08-25	12	5	1.614	78	11.9	LS	0.05	0.07	0.61	0.806061
199	2	Krathis_Up	KrSu19	2015-08-25	13	6	1.525	98	12.2	BO	0.07	0.16	0.22	0.856738
200	2	Krathis_Up	KrSu20	2015-08-25	5	3	0.169	174	12.2	BO	0.07	0.24	0.11	0.321843
201	3	Ag. Dimitrios	AgDSu1	2015-08-25	15	6	1.87	194	24	SS	0.04	0.13	1.03	0.838094
202	3	Ag. Dimitrios	AgDSu2	2015-08-25	9	5	1.401	110	23.9	MG	0.026	0.07	0.19	0.582315
203	3	Ag. Dimitrios	AgDSu3	2015-08-25	14	6	1.904	115	23.8	LS	0.05	0.1	0.07	0.803111
204	3	Ag. Dimitrios	AgDSu4	2015-08-25	15	7	1.722	481	23.6	LG	0.03	0.12	0.1	0.904696
205	3	Ag. Dimitrios	AgDSu5	2015-08-25	17	7	1.913	216	23.5	LS	0.05	0.09	0	0.924585
206	3	Ag. Dimitrios	AgDSu6	2015-08-25	15	5	2.052	151	23.3	LG	0.03	0.16	0.4	0.827191
207	3	Ag. Dimitrios	AgDSu7	2015-08-25	12	5	1.463	72	23.3	LS	0.05	0.08	0	0.654068
208	3	Ag. Dimitrios	AgDSu8	2015-08-25	13	4	1.72	189	23.5	MG	0.026	0.13	0.12	0.710923
209	3	Ag. Dimitrios	AgDSu9	2015-08-25	10	5	1.932	36	23.5	BO	0.07	0.17	0	0.668092
210	3	Ag. Dimitrios	AgDSu10	2015-08-25	17	5	1.997	211	23.4	LG	0.03	0.07	0.23	0.878683
211	3	Ag. Dimitrios	AgDSu11	2015-08-25	14	6	1.579	109	23.3	LG	0.03	0.06	0.27	0.754349
212	3	Ag. Dimitrios	AgDSu12	2015-08-25	16	7	1.709	163	23.2	LG	0.03	0.16	0.16	0.860212
213	3	Ag. Dimitrios	AgDSu13	2015-08-25	10	4	1.732	58	23.2	BO	0.07	0.31	0	0.614854
214	3	Ag. Dimitrios	AgDSu14	2015-08-25	13	5	1.861	158	23.2	SS	0.04	0.14	0.51	0.753664
215	3	Ag. Dimitrios	AgDSu15	2015-08-25	15	6	1.627	196	23.2	LS	0.05	0.14	0.09	0.802984
216	3	Ag. Dimitrios	AgDSu16	2015-08-25	12	5	1.921	120	22.9	LS	0.05	0.2	0.59	0.731006
217	3	Ag. Dimitrios	AgDSu17	2015-08-25	14	6	1.699	206	23	SS	0.04	0.09	0.46	0.79206
218	3	Ag. Dimitrios	AgDSu18	2015-08-25	8	5	1.274	39	23.9	BO	0.07	0.19	0	0.525458
219	3	Ag. Dimitrios	AgDSu19	2015-08-25	12	4	1.863	104	23.7	LG	0.03	0.11	0.23	0.690629
220	3	Ag. Dimitrios	AgDSu20	2015-08-25	12	6	1.579	53	23.4	LG	0.03	0.08	0.09	0.695648
221	4	Parapeiros_W	ParWSu1	2015-08-26	12	5	1.877	55	21.2	LS	0.05	0.22	0.09	0.847066
222	4	Parapeiros_W	ParWSu2	2015-08-26	4	0	1.149	9	21.1	SS	0.04	0.18	0	0.28615
223	4	Parapeiros_W	ParWSu3	2015-08-26	10	4	1.447	62	21.2	SS	0.04	0.21	0.27	0.695276
224	4	Parapeiros_W	ParWSu4	2015-08-26	6	2	1.257	32	21.1	BO	0.07	0.16	0.07	0.454971
225	4	Parapeiros_W	ParWSu5	2015-08-26	11	2	1.581	40	21.4	LS	0.05	0.21	0.22	0.643505
226	4	Parapeiros_W	ParWSu6	2015-08-26	9	4	1.528	56	21.4	SS	0.04	0.14	0.04	0.675687
227	4	Parapeiros_W	ParWSu7	2015-08-26	9	4	1.851	82	21.3	BO	0.07	0.2	0.1	0.745865
228	4	Parapeiros_W	ParWSu8	2015-08-26	10	4	1.725	54	21.6	LS	0.05	0.16	0.28	0.73015
229	4	Parapeiros_W	ParWSu9	2015-08-26	11	5	1.897	78	21.6	SS	0.04	0.13	0.32	0.84272
230	4	Parapeiros_W	ParWSu10	2015-08-26	8	3	1.762	19	21.5	BO	0.07	0.13	0	0.612941
231	4	Parapeiros_W	ParWSu11	2015-08-26	8	3	1.4	50	21.9	LS	0.05	0.16	0.1	0.584826
232	4	Parapeiros_W	ParWSu12	2015-08-26	8	3	1.532	43	21.9	LS	0.05	0.15	0.23	0.598695
233	4	Parapeiros_W	ParWSu13	2015-08-26	6	3	1.552	15	22	LS	0.05	0.12	0	0.524824
234	4	Parapeiros_W	ParWSu14	2015-08-26	5	2	1.414	25	21.8	SS	0.04	0.23	0.18	0.445913
235	4	Parapeiros_W	ParWSu15	2015-08-26	9	4	1.743	40	21.8	BO	0.07	0.18	0	0.694411
236	4	Parapeiros_W	ParWSu16	2015-08-26	12	5	2.005	43	21.7	LS	0.05	0.16	0.06	0.856134
237	4	Parapeiros_W	ParWSu17	2015-08-26	9	3	1.699	30	21.9	LS	0.05	0.12	0.25	0.639425
238	4	Parapeiros_W	ParWSu18	2015-08-26	15	5	1.91	119	21.9	LS	0.05	0.12	0.16	0.985786
239	4	Parapeiros_W	ParWSu19	2015-08-26	10	5	2.002	62	22	LS	0.05	0.19	0.49	0.818319
240	4	Parapeiros_W	ParWSu20	2015-08-26	15	5	1.742	118	22.1	SS	0.04	0.08	0.43	0.959808
241	5	Evinos_Up	EviSu1	2015-08-27	6	4	1.267	51	17.9	LG	0.03	0.14	0.33	0.540289
242	5	Evinos_Up	EviSu2	2015-08-27	8	5	1.754	38	17.9	LS	0.05	0.14	0.15	0.693024
243	5	Evinos_Up	EviSu3	2015-08-27	5	3	1.468	24	17.9	LS	0.05	0.17	0	0.482624
244	5	Evinos_Up	EviSu4	2015-08-27	7	4	1.609	32	18.4	SS	0.04	0.19	0.47	0.605107
245	5	Evinos_Up	EviSu5	2015-08-27	12	6	2.111	74	18.4	LS	0.05	0.14	0.21	0.938095
246	5	Evinos_Up	EviSu6	2015-08-27	8	5	1.703	42	18.4	LG	0.03	0.13	0.1	0.68938
247	5	Evinos_Up	EviSu7	2015-08-27	5	4	1.295	14	18.5	LS	0.05	0.34	0.12	0.477601
248	5	Evinos_Up	EviSu8	2015-08-27	10	5	1.771	53	18.5	BO	0.07	0.28	0.02	0.77562
249	5	Evinos_Up	EviSu9	2015-08-27	7	5	1.002	81	18.7	LG	0.03	0.17	0.27	0.59156
250	5	Evinos_Up	EviSu10	2015-08-27	8	4	1.749	27	18.7	SS	0.04	0.15	0.65	0.653832
251	5	Evinos_Up	EviSu11	2015-08-27	7	4	1.225	84	18.7	MG	0.026	0.15	0.07	0.597383
252	5	Evinos_Up	EviSu12	2015-08-27	6	4	1.58	26	18.8	LS	0.05	0.33	0.39	0.562247
253	5	Evinos_Up	EviSu13	2015-08-27	8	5	1.61	53	18.4	LG	0.03	0.08	0.2	0.686073
254	5	Evinos_Up	EviSu14	2015-08-27	9	6	1.775	72	18.4	BO	0.07	0.25	0.61	0.788544
255	5	Evinos_Up	EviSu15	2015-08-27	7	5	1.693	60	18.5	LS	0.05	0.09	0.37	0.670841
256	5	Evinos_Up	EviSu16	2015-08-27	10	7	1.811	47	18.7	SS	0.04	0.19	0.28	0.833042
257	5	Evinos_Up	EviSu17	2015-08-27	10	6	1.837	111	18.9	LS	0.05	0.2	0.32	0.865823
258	5	Evinos_Up	EviSu18	2015-08-27	10	6	1.968	52	18.9	SS	0.04	0.15	0.28	0.831287
259	5	Evinos_Up	EviSu19	2015-08-27	9	6	1.605	56	18.9	BO	0.07	0.08	0.09	0.74997
260	5	Evinos_Up	EviSu20	2015-08-27	9	5	1.881	79	18.9	SS	0.04	0.34	0.93	0.781342
261	6	Mornos_Up	MorSu1	2015-08-26	15	7	1.998	155	23.8	LG	0.03	0.14	0.49	0.93446
262	6	Mornos_Up	MorSu2	2015-08-26	11	7	1.971	159	23.8	LS	0.05	0.18	0.71	0.826769
263	6	Mornos_Up	MorSu3	2015-08-26	12	8	2.103	94	23.7	BO	0.07	0.16	0.38	0.854863
264	6	Mornos_Up	MorSu4	2015-08-26	11	7	2.199	57	23.6	SS	0.04	0.2	0.24	0.792513
265	6	Mornos_Up	MorSu5	2015-08-26	9	5	2.062	18	23.6	BO	0.07	0.18	0.09	0.646688
266	6	Mornos_Up	MorSu6	2015-08-26	9	7	1.924	37	23.6	LS	0.05	0.24	0.32	0.690543
267	6	Mornos_Up	MorSu7	2015-08-26	11	6	1.953	56	23.7	LG	0.03	0.18	0.24	0.734629
268	6	Mornos_Up	MorSu8	2015-08-26	8	7	1.802	54	24.4	SS	0.04	0.17	0.24	0.658572
269	6	Mornos_Up	MorSu9	2015-08-26	5	3	1.557	10	24.2	FG	0.024	0.27	0.1	0.418775
270	6	Mornos_Up	MorSu10	2015-08-26	8	3	1.049	28	24.2	SAND	0.022	0.2	0	0.443487
271	6	Mornos_Up	MorSu11	2015-08-26	9	4	2.05	29	24	LG	0.03	0.37	0.13	0.627033
272	6	Mornos_Up	MorSu12	2015-08-26	8	6	1.848	21	24	BO	0.07	0.24	0.05	0.618849
273	6	Mornos_Up	MorSu13	2015-08-26	10	7	1.839	42	24	LS	0.05	0.37	0.55	0.709209
274	6	Mornos_Up	MorSu14	2015-08-26	8	5	1.908	18	24	LS	0.05	0.27	0.14	0.599829
275	6	Mornos_Up	MorSu15	2015-08-26	6	4	1.667	8	24.1	SS	0.04	0.09	0.13	0.483607
276	6	Mornos_Up	MorSu16	2015-08-26	7	5	1.748	10	24.1	LS	0.05	0.36	0.16	0.547152
277	6	Mornos_Up	MorSu17	2015-08-26	13	6	2.288	66	24.1	LS	0.05	0.28	0.31	0.838176
278	6	Mornos_Up	MorSu18	2015-08-26	12	8	1.857	42	24.5	SS	0.04	0.24	0.85	0.789903
279	6	Mornos_Up	MorSu19	2015-08-26	13	7	1.735	100	24.4	BO	0.07	0.18	0.42	0.812051
280	6	Mornos_Up	MorSu20	2015-08-26	7	5	1.618	28	24.4	LG	0.03	0.13	0.29	0.541427
281	7	Per06.1	Per06Su1	2015-08-28	10	6	1.513	107	12.9	BO	0.07	0.09	0	0.521101
282	7	Per06.1	Per06Su2	2015-08-28	12	5	2.043	123	12.9	SS	0.04	0.12	0.13	0.612462
283	7	Per06.1	Per06Su3	2015-08-28	11	7	1.86	72	12.9	LS	0.05	0.07	0.03	0.592078
284	7	Per06.1	Per06Su4	2015-08-28	20	10	2.233	183	12.9	LG	0.03	0.04	0.33	0.896913
285	7	Per06.1	Per06Su5	2015-08-28	9	6	1.888	45	13.1	SS	0.04	0.21	0.08	0.531597
286	7	Per06.1	Per06Su6	2015-08-28	14	7	2.378	32	13.1	BO	0.07	0.24	0.18	0.703108
287	7	Per06.1	Per06Su7	2015-08-28	10	4	1.815	62	13.1	LS	0.05	0.18	0.06	0.509942
288	7	Per06.1	Per06Su8	2015-08-28	14	8	1.694	60	13.1	BO	0.07	0.18	0	0.643022
289	7	Per06.1	Per06Su9	2015-08-28	16	6	1.909	137	13.1	LS	0.05	0.24	0.2	0.69394
290	7	Per06.1	Per06Su10	2015-08-28	10	5	1.881	40	13.1	LG	0.03	0.15	0	0.530147
291	7	Per06.1	Per06Su11	2015-08-28	17	7	1.543	111	13.2	SS	0.04	0.24	0.16	0.677547
292	7	Per06.1	Per06Su12	2015-08-28	12	7	1.865	141	13.2	LS	0.05	0.09	0.75	0.631527
293	7	Per06.1	Per06Su13	2015-08-28	15	8	2.014	349	13.2	BO	0.07	0.14	0.14	0.785248
294	7	Per06.1	Per06Su14	2015-08-28	21	11	2.025	283	13.3	LS	0.05	0.07	0.19	0.936556
295	7	Per06.1	Per06Su15	2015-08-28	15	7	1.027	154	13.6	BO	0.07	0.22	0.24	0.586676
296	7	Per06.1	Per06Su16	2015-08-28	12	5	2.02	103	13.6	SS	0.04	0.17	0.17	0.603829
297	7	Per06.1	Per06Su17	2015-08-28	14	9	2.084	211	13.6	LG	0.03	0.11	0.21	0.753671
298	7	Per06.1	Per06Su18	2015-08-28	13	7	1.301	157	13.6	LS	0.05	0.2	0	0.584007
299	7	Per06.1	Per06Su19	2015-08-28	13	6	2.056	109	14.1	SS	0.04	0.07	0.27	0.64732
300	7	Per06.1	Per06Su20	2015-08-28	14	6	1.797	147	14.1	LG	0.03	0.14	0.14	0.644581
301	8	SidePer10	SidePSu1	2015-08-28	9	6	1.06	89	18.9	LS	0.05	0.44	0.2	0.545434
302	8	SidePer10	SidePSu2	2015-08-28	15	9	1.642	101	18.9	BO	0.07	0.24	0.08	0.850083
303	8	SidePer10	SidePSu3	2015-08-28	14	8	1.658	66	18.8	SS	0.04	0.54	0.19	0.791148
304	8	SidePer10	SidePSu4	2015-08-28	7	3	0.682	74	18.8	LS	0.05	0.64	0.19	0.368742
305	8	SidePer10	SidePSu5	2015-08-28	7	3	0.44	250	18.9	SAND	0.022	0.37	0	0.404554
306	8	SidePer10	SidePSu6	2015-08-28	9	5	1.258	37	18.9	BO	0.07	0.66	0.11	0.530711
307	8	SidePer10	SidePSu7	2015-08-28	6	4	1.523	15	18.9	LS	0.05	0.8	0.16	0.462564
308	8	SidePer10	SidePSu8	2015-08-28	14	7	1.88	125	18.9	LS	0.05	0.18	0.32	0.824255
309	8	SidePer10	SidePSu9	2015-08-28	16	7	2.072	139	18.9	BO	0.07	0.23	0.57	0.907297
310	8	SidePer10	SidePSu10	2015-08-28	11	8	1.778	55	18.9	LS	0.05	0.18	0.51	0.728899
311	8	SidePer10	SidePSu11	2015-08-28	4	3	1.007	21	18.5	LS	0.05	0.24	0.13	0.318992
312	8	SidePer10	SidePSu12	2015-08-28	13	6	1.996	91	18.5	LS	0.05	0.26	0.28	0.780012
313	8	SidePer10	SidePSu13	2015-08-28	7	4	1.371	30	18.4	SS	0.04	0.29	0.63	0.471839
314	8	SidePer10	SidePSu14	2015-08-28	7	6	1.834	10	17.9	BO	0.07	0.62	0.82	0.574458
315	8	SidePer10	SidePSu15	2015-08-28	2	1	0.562	4	17.9	BO	0.07	0.42	0.11	0.154146
316	8	SidePer10	SidePSu16	2015-08-28	15	8	1.943	172	17.9	LS	0.05	0.38	0.09	0.899281
317	8	SidePer10	SidePSu17	2015-08-28	9	7	1.952	27	17.9	SS	0.04	0.04	0.34	0.670346
318	8	SidePer10	SidePSu18	2015-08-28	13	7	2.086	100	17.9	BO	0.07	0.06	0.49	0.818698
319	8	SidePer10	SidePSu19	2015-08-28	15	9	2.099	225	17.9	LG	0.03	0.12	0.41	0.965
320	8	SidePer10	SidePSu20	2015-08-28	11	6	1.646	80	17.9	LG	0.03	0.17	0.27	0.675588
321	1	Fouskari	FouAu1	2015-10-20	11	5	1.307	79	16.9	BO	0.07	0.1	0.47	0.820828
322	1	Fouskari	FouAu2	2015-10-20	10	5	1.601	110	16.9	SS	0.04	0.14	0.44	0.864191
323	1	Fouskari	FouAu3	2015-10-20	10	4	1.391	87	16.9	LG	0.03	0.12	0.47	0.775296
324	1	Fouskari	FouAu4	2015-10-20	5	2	1.398	25	16.9	SS	0.04	0.32	0.45	0.486754
325	1	Fouskari	FouAu5	2015-10-20	7	3	1.745	26	16.9	LG	0.03	0.3	0.19	0.644923
326	1	Fouskari	FouAu6	2015-10-20	6	2	1.394	23	16.9	BO	0.07	0.27	0.43	0.517609
327	1	Fouskari	FouAu7	2015-10-20	12	6	1.768	89	16.9	LG	0.03	0.14	0.16	0.972658
328	1	Fouskari	FouAu8	2015-10-20	6	3	0.916	33	16.9	FG	0.024	0.17	0.25	0.481155
329	1	Fouskari	FouAu9	2015-10-20	8	2	1.381	60	16.9	LS	0.05	0.57	0.33	0.615767
330	1	Fouskari	FouAu10	2015-10-20	6	1	1.247	36	16.9	SS	0.04	0.29	0	0.471836
331	1	Fouskari	FouAu11	2015-10-20	9	4	1.394	65	17	LS	0.05	0.24	0.78	0.722457
332	1	Fouskari	FouAu12	2015-10-20	8	4	1.067	52	17	BO	0.07	0.34	0.36	0.623345
333	1	Fouskari	FouAu13	2015-10-20	9	5	1.6	49	17	SS	0.04	0.16	0.32	0.775239
334	1	Fouskari	FouAu14	2015-10-20	5	2	0.681	52	17.1	SS	0.04	0.13	0.02	0.392982
335	1	Fouskari	FouAu15	2015-10-20	8	4	1.432	49	17.1	LS	0.05	0.22	0.43	0.680849
336	1	Fouskari	FouAu16	2015-10-20	12	6	1.748	105	17.1	BO	0.07	0.22	0.04	0.983903
337	1	Fouskari	FouAu17	2015-10-20	11	6	1.285	62	17.1	SS	0.04	0.09	0.32	0.835077
338	1	Fouskari	FouAu18	2015-10-20	8	4	1.544	51	17.1	LG	0.03	0.13	0.05	0.701149
339	1	Fouskari	FouAu19	2015-10-20	10	6	1.818	30	17.1	LS	0.05	0.23	0.75	0.860606
340	1	Fouskari	FouAu20	2015-10-20	7	3	1.051	54	17.1	SS	0.04	0.09	0.15	0.555857
341	2	Krathis_Up	KrAu1	2015-10-21	9	4	1.711	24	11.1	LG	0.03	0.05	0.25	0.616167
342	2	Krathis_Up	KrAu2	2015-10-21	11	5	1.463	67	11.1	LG	0.03	0.12	0.4	0.707062
343	2	Krathis_Up	KrAu3	2015-10-21	8	4	1.255	46	11.1	SAND	0.022	0.22	0	0.548389
344	2	Krathis_Up	KrAu4	2015-10-21	7	4	1.465	43	11.1	MG	0.026	0.13	0.2	0.547859
345	2	Krathis_Up	KrAu5	2015-10-21	9	4	2.059	19	11.1	SS	0.04	0.16	0.5	0.65945
346	2	Krathis_Up	KrAu6	2015-10-21	4	3	0.574	27	11.1	BO	0.07	0.22	0.88	0.299376
347	2	Krathis_Up	KrAu7	2015-10-21	3	3	0.831	16	11.1	LS	0.05	0.26	1.08	0.297293
348	2	Krathis_Up	KrAu8	2015-10-21	15	7	2.16	56	11.1	SS	0.04	0.12	0.22	0.956566
349	2	Krathis_Up	KrAu9	2015-10-21	11	5	1.398	79	11.1	LS	0.05	0.14	0.14	0.710155
350	2	Krathis_Up	KrAu10	2015-10-21	6	3	0.602	51	11.1	BO	0.07	0.3	0.27	0.380841
351	2	Krathis_Up	KrAu11	2015-10-21	9	5	1.542	23	11.1	LS	0.05	0.2	0.13	0.620256
352	2	Krathis_Up	KrAu12	2015-10-21	7	4	0.746	55	11.1	SS	0.04	0.24	0.53	0.460119
353	2	Krathis_Up	KrAu13	2015-10-21	10	4	2.011	20	11.1	LG	0.03	0.1	0.35	0.68046
354	2	Krathis_Up	KrAu14	2015-10-21	4	2	1.143	16	11.1	LS	0.05	0.06	0.39	0.338721
355	2	Krathis_Up	KrAu15	2015-10-21	13	7	1.82	62	11.1	LG	0.03	0.1	0.27	0.862071
356	2	Krathis_Up	KrAu16	2015-10-21	8	5	1.245	61	11.1	LS	0.05	0.21	0.36	0.590723
357	2	Krathis_Up	KrAu17	2015-10-21	12	6	1.52	99	11.1	SS	0.04	0.14	0.65	0.80254
358	2	Krathis_Up	KrAu18	2015-10-21	12	6	1.848	71	11.1	SS	0.04	0.16	0.41	0.819812
359	2	Krathis_Up	KrAu19	2015-10-21	12	5	1.877	35	11.1	MG	0.026	0.16	0.08	0.758905
360	2	Krathis_Up	KrAu20	2015-10-21	5	1	0.813	23	11.1	SS	0.04	0.23	0.15	0.298054
361	3	Ag. Dimitrios	AgDAu1	2015-10-21	10	4	1.812	31	16.9	SS	0.04	0.05	0.31	0.685558
362	3	Ag. Dimitrios	AgDAu2	2015-10-21	15	5	2.023	97	16.9	LG	0.03	0.09	0.28	0.919384
363	3	Ag. Dimitrios	AgDAu3	2015-10-21	9	3	1.624	89	16.8	LS	0.05	0.13	0.28	0.6292
364	3	Ag. Dimitrios	AgDAu4	2015-10-21	11	5	1.773	65	16.9	SS	0.04	0.15	0.35	0.758252
365	3	Ag. Dimitrios	AgDAu5	2015-10-21	6	4	1.366	33	16.8	SS	0.04	0.04	0.34	0.513839
366	3	Ag. Dimitrios	AgDAu6	2015-10-21	4	2	1.242	6	16.8	BO	0.07	0.06	0	0.360776
367	3	Ag. Dimitrios	AgDAu7	2015-10-21	9	4	1.595	35	16.9	FG	0.024	0.13	0.03	0.628885
368	3	Ag. Dimitrios	AgDAu8	2015-10-21	9	4	1.172	86	16.8	LG	0.03	0.16	0.38	0.593874
369	3	Ag. Dimitrios	AgDAu9	2015-10-21	10	3	1.331	79	16.8	LG	0.03	0.09	0.28	0.606982
370	3	Ag. Dimitrios	AgDAu10	2015-10-21	11	6	1.2	165	16.8	LG	0.03	0.08	0.36	0.760961
371	3	Ag. Dimitrios	AgDAu11	2015-10-21	10	4	1.833	23	16.8	SS	0.04	0.2	0.52	0.684324
372	3	Ag. Dimitrios	AgDAu12	2015-10-21	3	1	0.566	12	16.8	FG	0.024	0.14	0.05	0.20379
373	3	Ag. Dimitrios	AgDAu13	2015-10-21	7	3	0.704	45	16.8	SS	0.04	0.14	0.21	0.415523
374	3	Ag. Dimitrios	AgDAu14	2015-10-21	9	5	1.498	87	16.8	BO	0.07	0.14	0.07	0.676095
375	3	Ag. Dimitrios	AgDAu15	2015-10-21	10	6	1.497	59	16.8	BO	0.07	0.12	0	0.720729
376	3	Ag. Dimitrios	AgDAu16	2015-10-21	4	3	1.137	15	16.8	LS	0.05	0.33	0.33	0.38343
377	3	Ag. Dimitrios	AgDAu17	2015-10-21	6	4	0.9	26	16.8	LS	0.05	0.1	0.1	0.440929
378	3	Ag. Dimitrios	AgDAu18	2015-10-21	3	2	1.04	4	16.8	MG	0.026	0.24	0.1	0.303067
379	3	Ag. Dimitrios	AgDAu19	2015-10-21	13	6	1.811	184	16.2	SS	0.04	0.5	0.27	0.915228
380	3	Ag. Dimitrios	AgDAu20	2015-10-21	5	2	0.847	26	16.8	LS	0.05	0.3	0.12	0.339736
